# Supplementary material
Source: PubMed Central journal article supplement (PMC6938577)
Supplement: NIHMS1533381-supplement-1.pdf [file NIHMS1533381-supplement-1.pdf]

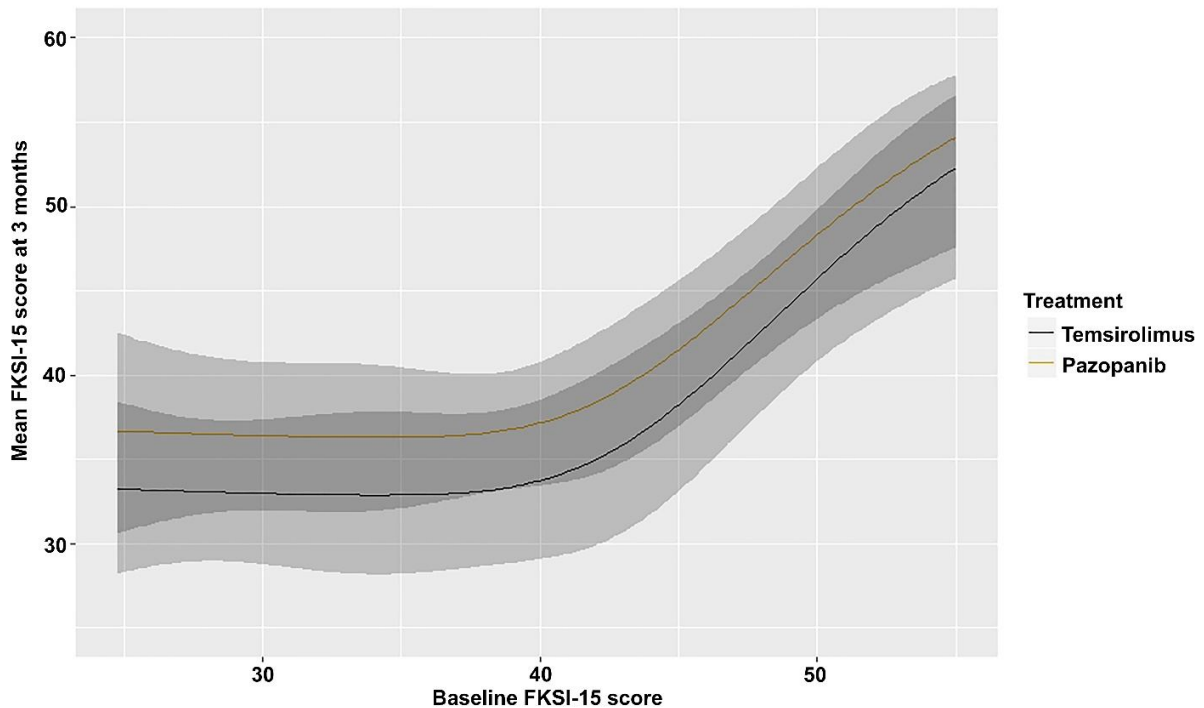

Figure 3

Supplementary material

Supplementary Methods

*Patients*

Additional key exclusion criteria included uncontrolled brain metastases, major surgery within 28 days of registration, uncontrolled hypertension, and clinically significant cardiovascular disease.

All of the patients enrolled on this trial provided written informed consent that was based on the Declaration of Helsinki principles. Throughout the trial, efficacy and safety were reviewed by a data and safety monitoring committee. The study was approved by the institutional review board and was conducted according to Good Clinical Practice guidelines as defined by the International Conference on Harmonization.

*End Points and Assessments*

PFS was defined as the time interval between registration date and the date of disease progression or death due to any cause. Patients who were alive and without disease progression at the last follow-up date were censored at that time. OS was defined as the time interval between registration date and the date of

death due to any cause. Patients who were alive were censored at the last follow-up date. Following the discontinuation of treatment, all patients were followed for safety and survival.

Upon PD, patients who had not suffered from an AE precluding continuation of systemic therapy were offered the option to continue therapy on protocol and receive the alternate agent after an applicable washout period of at least 2 weeks but no >8 weeks (to allow palliative radiation or surgery if needed). Baseline imaging evaluations including brain MRI were obtained before starting second-line (2L) drug. Assessments for eligibility and for efficacy and safety were conducted as in the 1L period.

An echocardiogram or multigated acquisition scan was obtained at baseline, every 24 weeks during treatment, and as clinically indicated.

#### *CAF Analysis*

Analyses were conducted at a Clinical Laboratory Improvement Amendments (CLIA)-certified facility. The CAF analysis included the 6 markers identified as prognostic/predictive in a previous study: VEGF-A (henceforth VEGF), osteopontin (OPN), hepatocyte growth factor (HGF), interleukin (IL)-6, IL-8 and tissue inhibitor of metalloproteinase (TIMP)-1 [7, 9]. Clinical laboratory determinations were used for LDH.

#### *Statistical Design and Analyses*

The Lan-DeMets spending function was used for the futility monitoring and the trial would be stopped early if the p-value used to assess futility at the interim analysis was greater than 0.4798. No alpha would be spent for the interim futility look.

PRO data analyses were performed using the regression modeling strategies (rms; <https://cran.r-project.org/package=rms>) statistical packages in R (version 3.5.1; <https://www.r-project.org>). Patients with missing data were excluded from the analysis. PRO scores are ordinal variables and thus violate the interval scale assumption required for change from baseline comparisons [10]. Thus, to determine whether PRO outcomes at 3 months differed between the two treatment groups adjusting for baseline PRO outcomes, we performed semiparametric ANCOVA using proportional odds models (orm function in rms). Each 3-month PRO was treated as an ordinal dependent variable with no binning. A smooth relationship was assumed between baseline and 3-month PRO outcomes, using restricted cubic splines with four knots. Wald statistics were used to determine the relative importance of treatment group with respect to 3-month PRO scores.

## Supplementary Results

Median PFS for IMDC intermediate-risk patients treated with temsirolimus 1L ( $n = 11$ ) was 3.8 months (95% CI 1.8–10.8), and 5.7 months (95% CI 1.7–10.0) in those treated with pazopanib 1L ( $n = 8$ ). Median PFS for IMDC poor-risk patients treated with temsirolimus 1L ( $n = 24$ ) v pazopanib 1L ( $n = 26$ ) was 1.9 months (95% CI 1.8–3.1) v 4.9 months (95% CI 2.5–6.5), respectively.

In IMDC intermediate-risk patients, median OS was 15.0 months (95% CI 5.9–32.6) for those treated with temsirolimus 1L compared to 14.5 months (95% CI 4.2–22.9) for those treated with pazopanib 1L. In IMDC poor-risk patients, median OS was 5.3 months (95% CI 3.1–7.9) compared to 9.6 months (95% CI 4.6–15.5) for temsirolimus 1L v pazopanib 1L, respectively.

One PR with pazopanib 1L was observed in IMDC intermediate-risk (among 8 patients; ORR 12.5%, 95% CI 0.3–52.7), and 6 in poor-risk patients (among 25 patients; ORR 24.0%, 95% CI 9.4–45.1). Furthermore, 1 PR with temsirolimus was observed in IMDC intermediate-risk patients (among 11 patients; ORR 9.1%, 95% CI 0.2–41.3), and 1 PR in the IMDC poor-risk patients (among 23 patients; ORR 4.3%, 95% CI 0.1–21.9).

Supplementary Table 1. Circulating Biomarkers Tested and Their Concentrations

| Biomarker | n  | Mean+/-SD (pg/mL)         | Median (range) (pg/mL)              |
|-----------|----|---------------------------|-------------------------------------|
| Insulin   | 59 | 27 +/- 23.1               | 18 (1.8, 108.4)                     |
| GH        | 59 | 539.2 +/- 591.9           | 297.3 (11.6, 2441.6)                |
| VEGF      | 59 | 300.7 +/- 250.3           | 212.6 (56.2, 1298.7)                |
| C-peptide | 59 | 5166.8 +/- 3310.3         | 4241.1 (734.2, 18710.3)             |
| CRP       | 59 | 93836882.7 +/- 97419054.5 | 73127810.8 (1509310.5, 530910629.5) |
| IFN gamma | 59 | 3.1 +/- 7                 | 0.6 (0, 48.7)                       |
| IL-10     | 59 | 9.1 +/- 15.7              | 3.8 (0.8, 110)                      |
| IL-12p70  | 59 | 94.1 +/- 265.9            | 3.9 (0.1, 1872.4)                   |
| IL-1a     | 59 | 46.4 +/- 116.8            | 6 (0, 807.7)                        |
| IL-1b     | 59 | 7.3 +/- 27.8              | 0.6 (0, 210.9)                      |
| IL-2      | 59 | 3.4 +/- 10.3              | 0.3 (0, 74.9)                       |
| IL-4      | 59 | 2.5 +/- 10.3              | 0.1 (0, 78.2)                       |
| IL-6      | 59 | 34.4 +/- 61.1             | 17.2 (1.8, 438.9)                   |
| IL-8      | 59 | 45.4 +/- 66.8             | 28.1 (7.9, 506.8)                   |
| TNF alpha | 59 | 11.1 +/- 30.8             | 1.1 (0, 219.3)                      |
| HGF       | 59 | 610.3 +/- 643.3           | 443.8 (149, 4229.1)                 |
| TIMP-1    | 59 | 271768.4 +/- 131195.8     | 251296.6 (82567.5, 636468.5)        |
| OPN       | 59 | 643730.2 +/- 1234002.5    | 309464.1 (60442.7, 9146336.5)       |

Abbreviations. SD, standard deviation. GH, growth hormone. VEGF, vascular endothelial growth factor. CRP, C-reactive protein. IFN, interferon. IL, interleukin. TNF, tumor necrosis factor. HGF, hepatocyte growth factor. TIMP-1, tissue inhibitor of metalloproteinase-1. OPN, osteopontin. LDH, lactate dehydrogenase.

| Supplementary Table 2. Baseline Patients Characteristics for Second Line Treatment |                          |      |                       |      |
|------------------------------------------------------------------------------------|--------------------------|------|-----------------------|------|
| Characteristic                                                                     | Treatment Arm            |      |                       |      |
|                                                                                    | Temsirolimus<br>(n = 15) |      | Pazopanib<br>(n = 21) |      |
|                                                                                    | No.                      | %    | No.                   | %    |
| Age, years                                                                         |                          |      |                       |      |
| Median                                                                             | 59                       |      | 58                    |      |
| Range                                                                              | 37-74                    |      | 42-68                 |      |
| Gender                                                                             |                          |      |                       |      |
| Female                                                                             | 2                        | 13.3 | 6                     | 28.6 |
| Male                                                                               | 13                       | 86.7 | 15                    | 71.4 |
| Ethnicity                                                                          |                          |      |                       |      |
| White                                                                              | 9                        | 60.0 | 17                    | 81.0 |
| Hispanic                                                                           | 1                        | 6.7  | 2                     | 9.5  |
| Other                                                                              | 5                        | 33.3 | 2                     | 9.5  |
| ECOG PS                                                                            |                          |      |                       |      |
| 0                                                                                  | 1                        | 6.7  | 1                     | 4.8  |
| 1                                                                                  | 8                        | 53.3 | 12                    | 57.1 |
| 2                                                                                  | 6                        | 40.0 | 8                     | 38.1 |
| Previous nephrectomy                                                               | 5                        | 33.3 | 8                     | 38.1 |
| Previous IL-2                                                                      | 1                        | 6.7  | 2                     | 9.5  |
| IMDC risk                                                                          |                          |      |                       |      |
| Intermediate                                                                       | 4                        | 26.7 | 8                     | 38.1 |
| Poor                                                                               | 11                       | 73.3 | 13                    | 61.9 |

Abbreviations. ECOG PS, Eastern Cooperative Oncology Group Performance Status. IL-2, interleukin-2. IMDC, International Metastatic Renal Cell Carcinoma Database Consortium.

Supplementary Table 3. Univariable Cox Proportional Hazards Models for PFS (N = 59; n events = 58) and OS (N = 59; n dead = 53). Biomarkers are fit in the model as continuous variables after log-transformation.

| Biomarker | PFS  |        |      |         | OS   |        |      |         |
|-----------|------|--------|------|---------|------|--------|------|---------|
|           | HR   | 95% CI |      | p-value | HR   | 95% CI |      | p-value |
| Insulin   | 0.88 | 0.65   | 1.20 | 0.420   | 0.83 | 0.60   | 1.15 | 0.272   |
| GH        | 1.17 | 0.97   | 1.41 | 0.106   | 1.23 | 0.99   | 1.54 | 0.059   |
| C-peptide | 1.16 | 0.78   | 1.73 | 0.468   | 1.02 | 0.66   | 1.59 | 0.914   |
| IFN gamma | 0.97 | 0.85   | 1.11 | 0.671   | 0.91 | 0.79   | 1.05 | 0.191   |
| IL-10     | 1.12 | 0.91   | 1.37 | 0.297   | 1.07 | 0.86   | 1.34 | 0.540   |
| IL-12 p70 | 0.98 | 0.90   | 1.08 | 0.726   | 0.94 | 0.85   | 1.04 | 0.210   |
| IL-1a     | 0.98 | 0.91   | 1.06 | 0.628   | 0.92 | 0.85   | 1.00 | 0.054   |
| IL-1b     | 1.00 | 0.88   | 1.12 | 0.944   | 0.91 | 0.79   | 1.04 | 0.152   |
| IL-2      | 1.00 | 0.89   | 1.12 | 0.964   | 0.92 | 0.81   | 1.05 | 0.226   |
| IL-4      | 1.00 | 0.89   | 1.13 | 0.987   | 0.91 | 0.80   | 1.04 | 0.177   |
| IL-8      | 1.20 | 0.92   | 1.57 | 0.180   | 1.08 | 0.80   | 1.46 | 0.611   |
| TNF-alpha | 0.99 | 0.90   | 1.09 | 0.887   | 0.95 | 0.86   | 1.06 | 0.347   |

Abbreviations. GH, growth hormone. IFN, interferon. IL, interleukin. TNF, tumor necrosis factor.

Supplementary Table 4. Fitted Cox Models for PFS to Assess Treatment Effect Within Each Biomarker Subgroup. Each model includes biomarker, treatment, and the interaction between biomarker and treatment.

| Biomarker | Level        | N  | Events | HR         | 95% CI |      | p-value | p-value interaction |
|-----------|--------------|----|--------|------------|--------|------|---------|---------------------|
|           |              |    |        | Tem v Pazo |        |      |         |                     |
| Insulin   | Below median | 29 | 28     | 1.04       | 0.49   | 2.20 | 0.912   | 0.336               |
|           | Above Median | 30 | 30     | 1.74       | 0.84   | 3.61 | 0.135   |                     |
| GH        | Below median | 29 | 28     | 1.01       | 0.47   | 2.15 | 0.987   | 0.052               |
|           | Above Median | 30 | 30     | 2.99       | 1.37   | 6.52 | 0.006   |                     |
| VEGF      | Below median | 29 | 28     | 1.45       | 0.69   | 3.09 | 0.329   | 0.893               |
|           | Above Median | 30 | 30     | 1.35       | 0.65   | 2.82 | 0.421   |                     |
| C-peptide | Below median | 29 | 28     | 1.03       | 0.49   | 2.18 | 0.931   | 0.268               |
|           | Above Median | 30 | 30     | 1.86       | 0.90   | 3.87 | 0.095   |                     |
| CRP       | Below median | 29 | 28     | 1.47       | 0.70   | 3.12 | 0.311   | 0.789               |
|           | Above Median | 30 | 30     | 1.28       | 0.62   | 2.64 | 0.510   |                     |
| IFN gamma | Below median | 29 | 29     | 1.86       | 0.85   | 4.04 | 0.119   | 0.321               |
|           | Above Median | 30 | 29     | 1.06       | 0.49   | 2.29 | 0.876   |                     |
| IL-10     | Below median | 29 | 28     | 1.44       | 0.66   | 3.13 | 0.360   | 0.684               |
|           | Above Median | 30 | 30     | 1.80       | 0.85   | 3.78 | 0.123   |                     |
| IL-12 p70 | Below median | 29 | 28     | 1.18       | 0.54   | 2.57 | 0.680   | 0.284               |
|           | Above Median | 30 | 30     | 2.14       | 1.01   | 4.54 | 0.048   |                     |
| IL-1a     | Below median | 29 | 28     | 0.93       | 0.44   | 1.96 | 0.843   | 0.065               |
|           | Above Median | 30 | 30     | 2.51       | 1.19   | 5.28 | 0.015   |                     |
| IL-1b     | Below median | 29 | 28     | 1.32       | 0.62   | 2.80 | 0.470   | 0.745               |
|           | Above Median | 30 | 30     | 1.57       | 0.76   | 3.25 | 0.226   |                     |
| IL-2      | Below median | 29 | 28     | 1.57       | 0.69   | 3.59 | 0.281   | 0.849               |
|           | Above Median | 30 | 30     | 1.76       | 0.81   | 3.80 | 0.153   |                     |
| IL-4      | Below median | 29 | 29     | 1.51       | 0.72   | 3.17 | 0.271   | 0.691               |



|           |              |    |    |      |      |      |       |       |
|-----------|--------------|----|----|------|------|------|-------|-------|
| IL-6      | Above Median | 30 | 29 | 1.22 | 0.58 | 2.57 | 0.592 | 0.274 |
|           | Below median | 29 | 28 | 1.77 | 0.84 | 3.74 | 0.136 |       |
| IL-8      | Above Median | 30 | 30 | 0.99 | 0.48 | 2.04 | 0.976 | 0.887 |
|           | Below median | 29 | 28 | 1.56 | 0.73 | 3.34 | 0.255 |       |
| TNF-alpha | Above Median | 30 | 30 | 1.44 | 0.70 | 3.00 | 0.325 | 0.064 |
|           | Below median | 29 | 28 | 0.75 | 0.33 | 1.70 | 0.488 |       |
| HGF       | Above Median | 30 | 30 | 2.25 | 1.03 | 4.88 | 0.041 | 0.822 |
|           | Below median | 29 | 28 | 1.40 | 0.66 | 2.95 | 0.381 |       |
| TIMP-1    | Above Median | 30 | 30 | 1.58 | 0.76 | 3.28 | 0.225 | 0.771 |
|           | Below median | 29 | 28 | 1.51 | 0.71 | 3.19 | 0.282 |       |
| OPN       | Above Median | 30 | 30 | 1.29 | 0.63 | 2.66 | 0.484 | 0.198 |
|           | Below median | 29 | 28 | 0.97 | 0.46 | 2.07 | 0.944 |       |
| LDH       | Above Median | 30 | 29 | 1.10 | 0.54 | 2.21 | 0.797 | 0.067 |
|           | Below median | 29 | 29 | 3.05 | 1.32 | 7.07 | 0.009 |       |

Abbreviations. Tem, temsirolimus. Pazo, pazopanib. GH, growth hormone. VEGF, vascular endothelial growth factor. CRP, C-reactive protein. IFN, interferon. IL, interleukin. TNF, tumor necrosis factor. HGF, hepatocyte growth factor. TIMP-1, tissue inhibitor of metalloproteinase. OPN, osteopontin. LDH, lactate dehydrogenase.
